# Supplementary material for: Mathematical Prediction and Optimization of Engineered Properties of Recycled Concrete with Marble Fines using Central Composite Design
Source: Research Square preprint supplement (doi:10.21203/rs.3.rs-6014610/v1), 2025-02-17
Supplement: Supplementary file 1 [file 2d77e4cf62498348ad9a85cc.docx]

**Highlights**

- Economic valorization of eco-friendly concrete made from fully recycled materials.

- Contribute to supplying the market with construction materials to meet growing demand.

- Encourage international companies to create a unified system for standardized construction aggregates.

- Investing laboratory results into predictive statistical approaches.
